# Mast cells: from lipid droplets to lipid mediators

Andrea DICHLBERGER\*<sup>1</sup>, Petri T. KOVANEN\* and Wolfgang J. SCHNEIDER†

\*Wihuri Research Institute, Helsinki, Finland, Kallioliinantie 4, 00140 Helsinki, Finland

†Department of Medical Biochemistry, Medical University Vienna, Max F. Perutz Laboratories, Dr. Bohrgasse 9/2, 1030 Vienna, Austria

## Abstract

LDs (lipid droplets) are metabolically highly active intracellular organelles. The lipid and protein profiles of LDs are cell-type-specific, and they undergo dynamic variation upon changes in the physiological state of a cell. It is well known that the main function of the LDs in adipocytes is to ensure energy supply and to maintain lipid homeostasis in the body. In contrast, LDs in inflammatory cells have been implicated in eicosanoid biosynthesis, particularly under inflammatory conditions, thereby enabling them to regulate immune responses. Human mast cells are potent effector cells of the innate immune system, and the triacylglycerol (triglyceride) stores of their cytoplasmic LDs have been shown to contain large amounts of arachidonic acid, the main precursor of pro-inflammatory eicosanoids. In the present review, we discuss the current knowledge about the formation and function of LDs in inflammatory cells with specific emphasis on arachidonic acid and eicosanoid metabolism. On the basis of findings reported previously and our new observations, we propose a model in which lipolysis of LD-triacylglycerols provides arachidonic acid for lipid mediator generation in human mast cells.

**Key words:** arachidonic acid, eicosanoid, lipid droplet, lipid mediator, mast cell, triacylglycerol (triglyceride)

## GENERAL FEATURES OF LIPID DROPLET BIOLOGY

LDs (lipid droplets) are dynamic organelles in the cytoplasm of many cell types. They are most easily recognized and visible in adipocytes and in macrophage foam cells, two types of cell in which the biology of LDs has been studied most extensively. In these and other cells, such as neutrophils and eosinophils, LDs have been shown to contain a large range of lipids and to be associated with an ever-growing number of newly discovered regulatory proteins and enzymes (reviewed in, for example, [1–7]). Originally, LDs were modelled as simple structures analogous to lipoprotein particles, i.e. consisting of a core of lipid esters and a surface lipid monolayer harbouring resident and exchangeable specific proteins. In adipocytes, the main component of the neutral lipid core of LDs are TAGs [triacylglycerols (triglycerides)], whereas, in macrophages/foam cells, the core consists mainly of CEs (cholesteryl esters). In addition, DAGs (diacylglycerols), retinylesters [7–9] and ether lipids have been reported to be components of the LD cores in different cell types [10,11]. The LD surface monolayer is viewed as consisting of PLs

(phospholipids), free cholesterol and lysophospholipids. However, it is likely that many minor lipid components of both the core and the surface layer of LDs have not yet been identified. This assumption appears to be supported by a growing body of experimental evidence, suggesting that the surface monolayer model of LDs is too simple. Further evidence for this notion is provided by recent biophysical studies of circulating lipoproteins, notably of LDL (low-density lipoprotein) particles [12] and/or VLDL (very-low-density lipoprotein) [13]. These investigations show that the resident apolipoprotein of these particles, ApoB (apolipoprotein B)-100, probably interacts in a dynamic fashion not only with the molecules of the surface PL layer, but also with components of the neutral lipid core. This property facilitates the formation of an interfacial third layer between the two lipid compartments [12] and, owing to the inherent conformational flexibility of the protein, permits dynamic adaptation to the different sizes of VLDL and LDL required for stabilization of the particles [13]. Interestingly, comparative proteomic studies of LDs in a variety of species, e.g. in yeast, *Drosophila* and several mammalian species (for example [4]), suggest that the core of LDs consists of several concentric layers of steryl esters which surround an inner core of TAG molecules. Indeed, evidence for

**Abbreviations:** AA, arachidonic acid; ACSL, acyl-CoA synthetase; ATGL, adipose triglyceride lipase; CE, cholesteryl esters; COX, cyclo-oxygenase; DAG, diacylglycerol; DGAT2, DAG-acyltransferase 2; EET, epoxyeicosatrienoic acid; ER, endoplasmic reticulum; HETE, hydroxyeicosatetraenoic acid; HPETE, hydroperoxyeicosatetraenoic acid; HSL, hormone-sensitive lipase; IL, interleukin; KITLG, KIT ligand; LD, lipid droplet; LDL, low-density lipoprotein; LO, lipoxygenase; LT, leukotriene; MC, mast cell; BMMC, bone-marrow-derived MC; MAG, monoacylglycerol; MGL, monoglyceride lipase; PAF, platelet-activating factor; PC, phosphatidylcholine; PE, phosphatidylethanolamine; PG, prostaglandin; PGHS, PGH synthase; PI phosphatidylinositol; PL, phospholipid; PLA<sub>2</sub>, phospholipase A<sub>2</sub>; cPLA<sub>2</sub>, cytosolic PLA<sub>2</sub>; sPLA<sub>2</sub>, secretory PLA<sub>2</sub>; TAG, triacylglycerol; VLDL, very-low-density lipoprotein.

<sup>1</sup>Winner of the *Clinical Science Young Investigator Award at the European Lipoprotein Club Meeting, held in Tutzing, Germany, from 5–8 September 2011.*

**Correspondence:** Dr Andrea Dichlberger (email andrea.dichlberger@wri.fi).

such a model has been provided for the yeast *Saccharomyces cerevisiae* [14]. Other models perceive LDs as being built of curled ER (endoplasmic reticulum) with associated ribosomes immersed in secreted TAGs/CEs, covered by a PL monolayer that, in fact, may be the cytoplasmic leaflet of the ER [15,16]. This multitude of suggested models probably reflects the observed large degree of inhomogeneities in size and contents of LDs, their wide variety of functions and their adaptation to different and/or rapidly changing metabolic conditions occurring in the LD-containing cell types. To avoid confusion, it is important to note that, depending on the emphasis of the respective studies, similar or identical structures have been referred to as fat bodies, spherosomes or lipid bodies in the literature. In addition, LDs of adipocytes have been termed adiposomes [17–19], which unfortunately is also the name chosen in some reports for adipocyte-secreted microvesicles [20,21]. In the present review, we designate the lipid-filled cytoplasmic structures and/or organelles as LDs.

Our knowledge about the lipid components of LDs, and also that about the LD proteome facilitating and/or regulating the assembly and degradation of LDs as well as about the utilization of specific molecules of LDs, is far from complete. The metabolic functions of LDs can be grouped into anabolic reactions, which include fatty acid synthesis and activation, and biosynthesis of sterols and TAG molecules, and catabolic reactions, which include hydrolysis, mobilization and further metabolism of the various components, particularly the fatty acids of PLs, steryl esters and TAGs. The proteins identified early on as actors in this dynamic picture include the PAT proteins perilipin/adipophilin/TIP-47, S3-12 and OXPAT (for a suggested nomenclature of LD proteins, see [22]), certain Rab proteins [23,24] and caveolins [24–27], a large number of lipid metabolic enzymes, lipolysis-modulating proteins and lipid transport proteins, and kinases and phosphatases acting on lipids and proteins (reviewed, for example, in [1,6]). Moreover, it is intriguing that an increasing number of proteins classically defined as residents of other cellular membranes and/or organelles have been proposed or demonstrated to be components of LDs. Since the ‘foreign’ proteins or subsets thereof are consistently co-isolated with highly purified LDs, it has been argued that LDs have tight associations and interactions with mitochondria, ER domains, endosomes and peroxisomes [3,16,28,29]. Such associations would enable LDs to perform a multitude of functions traditionally assigned to other subcellular organelles. The metabolic features of LDs as sites of storage and mobilization of lipids require the ability to rapidly change their complement of proteins as well as lipids in response to extracellular cues. Indeed, many of the above-described LD components can undergo large alterations in their numbers and metabolic state, for example in their phosphorylation status [3,7], without compromising the nature of these essential organelles.

The most easily observed function of LDs, i.e. accumulation of lipids for storage via influx, has been the starting point for attempts to delineate an integrated view of LDs as important organelles for assisting intracellular protein and lipid transport, which includes the mobilization and regulated efflux of lipids [5,6,30]. The rapid turnover of key LD components can perfectly fulfil the requirements for fatty acids to fuel cells, liberate

lipid components for membrane synthesis, deliver precursors for hormone synthesis and generate secretory signalling molecules (lipid mediators) via enzymatic conversion of stored precursors. Inflammatory cells, including one particularly interesting cell type, the MC (mast cell), produce and secrete powerful lipid mediators [31]. The mechanism underlying the generation of these mediators by MCs and the involvement of LDs in the process are the focus of the present review and are discussed below.

## LD FORMATION IN INFLAMMATORY CELLS

The molecular details of the processes of initiation and growth of LDs in any type of cell are still poorly understood. One reason for this shortcoming is that the experimental means to determine the mechanism and dynamics of LD formation are severely limited, for example by the fact that the size of a nascent LD is below the limits of resolution of light microscopy. Electron microscopic methodology, on the other hand, is limited to analysis of static images. Thus unambiguous experimental evidence for the mode of LD initiation is lacking. Notwithstanding this limitation, different models have been proposed, four of which can be deduced from the literature, as summarized previously in [6]. In short, these models include: (i) the ‘oiling out’ of TAGs synthesized *in situ* between the two ER leaflets [5]; (ii) bicelle formation, in which a lipid lens is excised from the ER [32]; (iii) budding of a bilayer vesicle, whose intramembranous space becomes filled with neutral lipids [6]; and (iv) LD growth by transfer of ER-derived neutral lipids into a concave depression (‘egg cup’) of the ER membrane [33]. The ‘egg cup’ model is based on data obtained by freeze–fracture electron microscopy, and in fact disputes that LDs form within the ER membrane bilayer [15]. In all of these models, LDs form towards the cytoplasmic aspect of the ER; however, LDs could also be of luminal origin [34]. Regardless of which model(s), if any, will ultimately prevail, all of these proposed mechanisms specify the ER as the key organelle for LD formation, and thus this feature appears to be the only well-established fact. In support of this conclusion, enzymes for the synthesis of a vast collection of lipids are resident proteins of the ER. Finally, a variation of the vesicle budding model posits that the droplets may never completely leave, but rather remain connected to the outer leaflet of the ER membrane [3,34], a notion which is in agreement with the cited proposals above for the internal structure of LDs [14–16].

Besides adipocytes and macrophages, the biology of the formation and functions of LDs has been studied in eosinophils and neutrophils in considerable detail. Melo et al. [35] have comprehensively summarized available data on the effects of exogenously added molecules as inducers of LD formation (see Table 1 in [35]) in various cell types. The lipid components reported to increase and/or stimulate LD formation were unsaturated, but not saturated, fatty acids, PAF (platelet-activating factor) and the eicosanoid PG (prostaglandin) D<sub>2</sub> (in eosinophils only). Among the unsaturated fatty acids, early investigations dealt with the incorporation of AA (arachidonic acid), the precursor of eicosanoids, as a tracer that indicated LD growth

**Table 1** MCs in which lipid droplets have been observed and/or studied

| Species | Source                                                                                                 | Reference(s) |
|---------|--------------------------------------------------------------------------------------------------------|--------------|
| Human   | MCs from lung tissue                                                                                   | [36,37,83]   |
|         | MCs derived from cord blood CD34 <sup>+</sup> progenitors                                              | [58]         |
|         | MCs derived from peripheral blood CD34 <sup>+</sup> progenitors                                        | [55]         |
|         | MCs (LAD 2) originally derived from bone-marrow-derived progenitors of an MC sarcoma/leukaemia patient | [55]         |
| Mouse   | MCs derived from bone marrow progenitors                                                               | [86]         |
| Rat     | Rat basophilic leukaemia cell line (RBL-2H3)                                                           | [86]         |

in human lung MCs and macrophages [36,37], in neutrophilic leucocytes [38] and in eosinophils [38,39]. Accordingly, studies on the cellular uptake of radiolabelled AA, as analysed by electron microscopic autoradiography, showed that exogenous AA was predominantly incorporated into LDs of MCs, macrophages, neutrophils, eosinophils and epithelial cells [36,38,40]. Lipid analysis of purified LDs provided confirmatory evidence that these organelles are reservoirs of arachidonoyl lipids. Importantly, eosinophils incorporated AA mainly into the PL pool [38], whereas in monocytes/macrophages neutral lipids appeared to be the major target of exogenous AA [41,42]. Comparative analysis of different human circulating inflammatory cells (monocytes, neutrophils, eosinophils and platelets) and tissue cells (lung macrophages and MCs) revealed macrophages and especially MCs to contain large amounts of AA. In fact,  $23 \pm 6$  and  $45 \pm 9\%$  of the total cellular AA is stored in the neutral lipid fraction of macrophages and MCs respectively, with  $\sim 80\%$  of the AA in neutral lipids residing in TAGs in both cell types [43]. However, neither the function(s) nor the mode of utilization of AA from the large TAG pool has been defined as yet.

As will be discussed in the next section, the identification of TAG-hydrolysing enzymes in LDs [16,17,28] is compatible with the proposal that AA from TAGs of LDs could be an indirect or direct source for cellular eicosanoid synthesis. This possibility is particularly relevant in the context of the significant amount of eicosanoids produced and secreted by activated MCs [31,44]. These recent findings suggest that the LDs of MCs constitute a new tool for studies of the regulatory mechanisms focusing on AA metabolism, eicosanoid biosynthesis and the release of pro-inflammatory lipid mediators.

### ACTIVATED MCs RELEASE PREFORMED PROTEINACEOUS AND NEWLY GENERATED LIPID MEDIATORS

MCs are highly potent effector cells residing at mucosal, submucosal and perivascular areas throughout the body. The expression of a comprehensive set of different cell-surface receptors and their linkage to multiple signalling pathways participating in the

exocytotic pathways enables these cells to rapidly respond to distinct stimuli by acutely releasing highly active mediators, hence regulating inflammation, host defence, tissue remodelling and homeostasis [45]. Besides their classical role in the development of IgE-mediated acute hypersensitivity reactions, including asthma and other allergic disorders, MCs exert pathophysiological effects in a wide range of different chronic inflammatory diseases, for example atherosclerosis, rheumatoid arthritis and obesity [46]. MCs originate in the bone marrow from pluripotent haemopoietic stem cells, circulate as progenitors and ultimately find their way into the various tissues of the body. Tissue homing of MC progenitors is mainly directed by KITLG [KIT ligand; also termed SCF (stem cell factor)], which is crucial for the development and survival of MCs. Mature tissue MCs are long-lived highly granulated cells whose activation and subsequent exocytosis of granules (degranulation) can be triggered by immunological [for example Fc $\epsilon$ RI (high-affinity receptor for IgE) cross-linking] and non-immunological (for example, pathogens and peptides) stimuli, thus leading to granule-mediated modification of the microenvironment of the activated cells [45]. The secretory granules of MCs are filled with various preformed mediator molecules, the best known of which are histamine, serotonin, heparin, the proteases tryptase, chymase and cathepsin G, as well as various cytokines, including IL (interleukin)-8 (reviewed in [45,47]).

Besides the secretion of preformed mediators during degranulation, MC activation also triggers the release of acutely *de-novo*-synthesized lipid mediators such as eicosanoids, but possibly also growth factors and various cytokines [45]. Compared with the comprehensive knowledge about the identity of preformed proteinaceous mediators in the granules of MCs, our insights into the biology of various lipid mediators are quite limited. In addition, given the lack of knowledge about the mechanisms for their secretion and their unknown, but probably very short, life span, it can be assumed that not all lipid mediators have been identified yet. Among the demonstrated lipid mediators of MCs, eicosanoids play a prominent role. The common precursor molecule for eicosanoids is AA, an  $\omega - 6$  polyunsaturated fatty acid with 20 C-atoms and four double bonds at positions 5, 8, 11 and 14 (i.e. 5,8,11,14-eicosatetraenoic acid). There are three major pathways of eicosanoid biosynthesis (see Figure 1), in which free AA is oxidized by: (i) COX (cyclo-oxygenase)-1 and/or COX-2 to form PGs, (ii) LOs (lipoxygenases) to generate HPETEs (hydroperoxyeicosatetraenoic acids) and subsequently LTs (leukotrienes), and (iii) cytochrome P450 epoxygenase and  $\omega$ -hydroxylase to produce EETs (epoxyeicosatrienoic acids) and HETEs (hydroxyeicosatetraenoic acids) respectively [48,49]. It is well established that, upon activation, MCs rapidly generate eicosanoid molecules of three kinds from AA [31]: the prostanoid PGD<sub>2</sub>, and the LTs LTB<sub>4</sub> and LTC<sub>4</sub>. A recent study reported for the first time comprehensive data about the phenotype-specific production and release of lipid mediators from murine MCs: 90 lipid mediators originating from the three major eicosanoid biosynthetic pathways were characterized by LC (liquid chromatography)–tandem MS [49]. The expression of COX-1 and COX-2 in human MCs is well-studied [48], as well as the expression of 5-LO [50] and 15-LO type 1 [51].

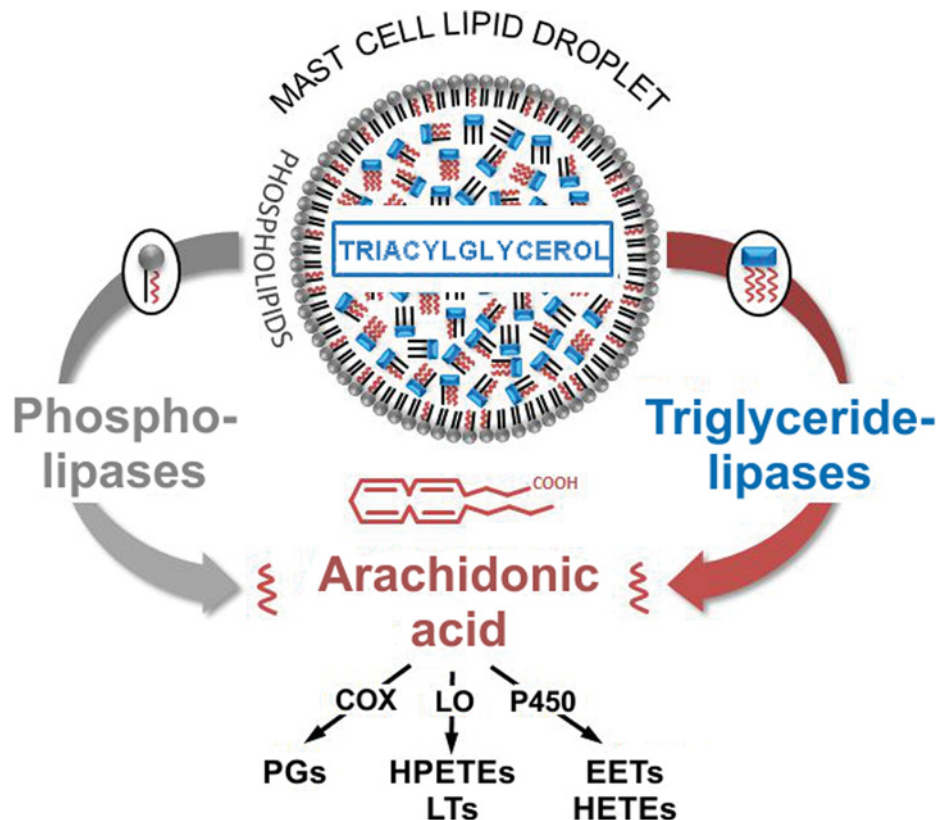

**Figure 1 Sources of AA for eicosanoid biosynthesis in human MC LDs**

MC LDs contain two major sources of AA: PLs as constituents of the LD surface monolayer and TAGs in the core of the LD. Phospholipases and triglyceride lipases mediate the liberation of AA from these two precursor pools to provide substrate for the biosynthesis of eicosanoids (PGs, LTs, HPETEs, EETs and HETEs) via three major pathways mediated by COXs, LOs and cytochrome P450 enzymes (P450). For further details, please refer to the text.

Inasmuch as the eicosanoid mediators can regulate MC functions *in vivo* by autocrine and paracrine mechanisms and the LTs exert pro-inflammatory actions on arterial endothelial cells and smooth muscle cells [52], LT production by arterial MCs may contribute to their pro-inflammatory and pro-atherogenic activities in the arterial wall. This raises the question about the mechanisms by which immunomodulatory cells, including MCs, can promote inflammatory states without inducing a severe allergic reaction or anaphylactic shock due to massive release of inflammatory mediators. Regarding this question, Theoharides et al. [45] have proposed a model for mediator secretion by MCs, which they call 'differential' or 'selective' release of the mediators, which is not coupled to degranulation. This model of selective release of mediators is also supported by a recent study on mouse BMMCs (bone-marrow-derived MCs) using an *in vitro* model of cell injury in which MCs release LTs, IL-6 and TNF (tumour necrosis factor)- $\alpha$ , but not histamine, due to the binding of fibroblast- and keratinocyte-derived IL-33 to T1/ST2 receptors on the surface of MCs [53].

In contrast, much less is known about the role of LDs as a site of lipid mediator generation. The seminal observation by Dvorak's group [36] in 1983 that LDs (then termed lipid bodies) in lung MCs serve as storage sites for AA was the first to implicate LDs in eicosanoid biosynthesis in MCs. Surprisingly, in the three

decades since publication of these results, only fragmentary novel information about the lipid and protein composition of MC LDs has been gained. Interestingly, LDs are found more frequently in MCs residing in regions of inflammation [54]. As the LDs in MCs collectively contain only minute amounts of TAGs compared with adipocytes and hepatocytes, they clearly must function in processes distinct from cellular and/or systemic TAG metabolism. Such processes probably include various intracellular pathways of lipid signalling and the release of lipid mediators. Indeed, the TAGs of LDs may contribute to the pool of AA utilized for MC lipid mediator secretion, as suggested by recent work from our laboratory [55]. This work was facilitated by the establishment of a protocol for the generation of human MCs under well-defined conditions in the absence of serum [56], and is also in accordance with findings demonstrating that human cord-blood-derived MCs contain LDs after *in vitro* differentiation and cultivation in the presence of 10% FBS (fetal bovine serum) [57,58]. Under serum-free culture conditions, we could generate mature and functional human MCs from peripheral-blood-derived CD34<sup>+</sup> progenitor cells in the presence of KITLG [56]. This protocol does produce exclusively connective tissue-type MCs, i.e. MCs that contain both tryptase and chymase in their granules. Interestingly, differentiation of the isolated CD34<sup>+</sup> progenitors into mature MCs was found to be accompanied by a steady

increase in the number and size of LDs [55]. When we incubated the MCs with unsaturated fatty acids, but not with saturated fatty acids, the formation of LDs was accelerated, and, in agreement with the early findings by Dvorak et al. [36], incubation of MCs with AA led to its efficient incorporation into the TAG pool of the MCs, which we could show to be the predominant lipid class in the LDs of MCs. In fact, by tandem MS, a unique species of TAG molecules containing arachidonoyl residues in all three positions could be demonstrated as components of LDs in MCs [55]. Furthermore, experiments designed to analyse the fate of LDs following stimulus-induced activation of the MCs showed that secretion of cytoplasmic granules was neither associated with a release of LDs nor was the appearance of LDs altered [55]. These results established an axis connecting extracellular AA with its uptake and subsequent delivery to the TAG pool of LDs in human MCs, and provide a basis for future experiments exploring the yet unknown mode of synthesis and release of lipid mediators by inflammatory cells. In the next section, we describe the current status of knowledge about this aspect of the pro-inflammatory function of such cells.

## SOURCES AND SITES OF LIPID MEDIATOR SYNTHESIS IN MCs

Most studies on LDs with human primary cells have been performed with isolated and purified blood leucocytes, notably basophils, neutrophils and eosinophils (reviewed in [35,54,59]). Since the circulating blood does not contain MCs, *in vitro* studies on MC biology require either isolation of MCs from a tissue or isolation of circulating MC progenitors and subsequent induction of their maturation under well-defined culture conditions. The difficulty of either method for obtaining mature human MCs probably explains the paucity of investigations on LDs in human MCs. The early work on LDs in human MCs have been limited to MCs isolated from human lungs, a rich source of MCs [37,43,60–62], but only few observations and/or studies about LDs in MCs derived from other sources have been reported (summarized in Table 1). However, it remains to be seen whether observations made in these cells in fact represent the characteristics of bona fide mature MCs in the respective species. Therefore we will restrict ourselves to studies with mature cells of the myeloblastic lineage (basophils, neutrophils and eosinophils) isolated from blood and/or thoroughly defined MC populations generated *in vitro* from progenitor cells.

Any cell harbouring LDs must maintain an appropriate amount of lipids in its complement of LDs in order to be able to react to extracellular cues in a more or less rapid fashion. As the neutral lipids in the core of the LDs provide fatty acids for a variety of purposes, the fatty acids must be rapidly replenished by re-esterification/re-acylation reactions. The same holds true for PLs in the peripheral layer of LDs. To facilitate cellular lipid homeostasis, fatty acids likely recycle between the PLs and TAGs. The PL molecules derived from the LDs themselves and/or from cellular lipid bilayer membranes and TAG molecules could be resynthesized by acyltransferase-catalysed reactions utilizing

PL- and TAG-derived fatty acids respectively. Despite the obvious validity of this metabolic concept, the biophysical problem of how lipolytic enzymes access their substrates within droplets has not been solved. To gain access to the hydrophobic substrates, either the enzyme must translocate its catalytic portion through the PL monolayer or a core lipid domain must emerge on the surface of the monolayer to become accessible to the lipase. It appears that the access of lipases to the LD core is regulated, at least in part, by PAT proteins. For instance, it has been shown that perilipin phosphorylation may be crucial for allowing HSL (hormone-sensitive lipase) to gain access to its substrates [63].

The catabolism of PLs can occur by employing a wide variety of phospholipases. The bulk of literature states that AA is mobilized by the action of various cytosolic and secretory enzymes belonging to the superfamily of the PLA<sub>2</sub> (phospholipase A<sub>2</sub>) enzymes [64], which have been characterized as hydrolysing the *sn*-2 fatty acyl bond of membrane glycerophospholipids. Depending on the stimulus [65], PC (phosphatidylcholine), PE (phosphatidylethanolamine) [66,67] and PI/PS (phosphatidylinositol/phosphatidylserine) [65,68] are important sources for AA production among the PLs, although the localization(s) of these PL pools has not been determined. However, PL species which are not prominent components of membranes, such as PA (phosphatidic acid) [69], MAGs (monoacylglycerols) and even lysophospholipids (reviewed in [70]), have also been proposed as AA donors in IgE-receptor-mediated activation of MCs [71]. The best-studied type of PLA<sub>2</sub>s, cPLA<sub>2α</sub> (cytosolic PLA<sub>2</sub>; also termed group IV PLA<sub>2</sub>), liberates AA from the ER, phagosomal membrane and the nuclear envelope, but, as claimed in [44], not from the plasma membrane. It is important to note that, although the association of cPLA<sub>2</sub> with LDs has been amply demonstrated, lipolysis by this enzyme of PL molecules in a surface lipid monolayer, such as that on LDs, has yet to be proven directly. In this context, sPLA<sub>2</sub>s (secretory PLA<sub>2</sub>s) have been reported to be active also intracellularly, i.e. in the course of their secretion [72]. Since these enzymes also act on the PL monolayer of lipoprotein particles, it is possible, by inference, that not only sPLA<sub>2</sub>s, but also cPLA<sub>2</sub>s can act on the single PL leaflet of LDs [73] (see Figure 1).

Regarding the relevant AA pathways in MCs, there is uncertainty about the identity of the enzymes involved in production of the substrate AA. Although cPLA<sub>2</sub> has been identified as an essential player(s) in the production of eicosanoids [69,74,75], the broad spectrum of enzymes with PLA<sub>2</sub> activity that have been discovered [76] makes it difficult to unambiguously identify any particular PLA<sub>2</sub> enzyme(s) as a regulator(s) of the MC response involving AA. For instance, one of the three cPLA<sub>2</sub>s in MCs shows a preference for several PL species bearing AA in the *sn*-2 position [77], whereas PI (over PC) was suggested to be the preferred substrate for certain cPLA<sub>2</sub>s [68]. In the case of cPLA<sub>2α</sub>, the PA produced by hydrolysis of PLs by PLD (phospholipase D) appears to be the major, but not exclusive, substrate for the enzyme [69]. Granata et al. [60] have reviewed studies on PLA<sub>2</sub>s, a complex group of enzymes released at low levels from immunomodulatory cells that include human lung MCs. Interestingly, the sPLA<sub>2</sub>s released from macrophages may also activate MCs and induce their degranulation in a paracrine fashion. Actually,

Fonteh et al. [78] were the first to report that immunologically activated murine BMMCs release sPLA<sub>2</sub> activity that contributes to AA production and eicosanoid biosynthesis. Subsequently, these observations were extended by showing that murine BMMCs express all members of the group II subfamily of sPLA<sub>2</sub>s [79]. However, Fonteh et al. [78] stated that, as in macrophages, it is doubtful that sPLA<sub>2</sub>s can mobilize AA from the plasma membrane of MCs, in agreement with the above-mentioned claim by Bozza et al. [44]. In a paper by Kikawada et al. [80], cPLA<sub>2α</sub> in combination with sPLA<sub>2</sub> as an amplifier was shown to regulate TLR2 (Toll-like receptor 2)-dependent eicosanoid production in murine MCs, but, again, the substrate(s) of these enzymes was not elucidated. In another study employing human neutrophils [81], the internalization of sPLA<sub>2</sub> subsequent to its binding to cell-surface heparan sulfate proteoglycans was reported to be important for the clearance of the cell-surface-bound enzyme, but appeared not to be directly linked to eicosanoid production. Finally, human group V sPLA<sub>2</sub> was suggested to induce group IVA cPLA<sub>2</sub>-independent cysteinyl-LT synthesis [82].

The evidence reviewed above is based on the dogma that PLs are by far the predominant, if not sole, source of AA for eicosanoid generation. However, this view may need to be modified in the light of several findings. In agreement with the, not yet proven, proposal that LDs contain membrane structures harbouring mostly ER-derived enzymes in their interior, eicosanoid-forming enzymes have been immunolocalized within LDs (reviewed in, for example, [16,44]). Specifically, PGHS (PGH synthase) 1 and PGH2 (also called COX-1 and COX-2) and LOs (5-LO, and in some cases 15-LO) have been localized to LDs in a variety of cells [44], and also in MCs [83]. The presence of these enzymes in LDs would allow for the focal formation of eicosanoids within LDs and the utilization of the substantial amounts of AA in the TAG pool of the LDs [44]. In such a setting, acylglycerol-hydrolysing lipases have been suggested to first liberate AA from TAGs for incorporation into PLs, from which PLA<sub>2</sub> activities would then release the acid for conversion into eicosanoids. Alternatively, the MC activation process, characterized by a rapid production and release of eicosanoids, would be considerably accelerated by bypassing the intermediate step described above, i.e. when the AA released from TAGs could be immediately used as a substrate for COX/LO enzymes (Figure 1). The most obvious candidate lipases for acting on the acylglycerols for direct release of AAs from TAGs, DAGs and MAGs appear to be ATGL (adipose triglyceride lipase), HSL and MGL (monoglyceride lipase), which are rather ubiquitously expressed enzymes. In fact, ATGL has already been shown beyond doubt to have a crucial role in initiating the lipolytic cascade of TAGs in adipocyte LDs [84]. However, the mode of fatty acid liberation from LDs by ATGL may vary widely among different cell types.

Detailed *in vitro* and *in vivo* studies on the stereoselectivity of ATGL, HSL and DGAT2 (DAG-acyltransferase 2) suggested a 'three-pool' model for cellular DAGs in mouse white adipose tissue [85]. Interestingly, ATGL alone specifically generates *sn*-1,3 DAGs, whereas, in the presence of its co-activator CGI-58, it also produces *sn*-2,3 DAGs. Moreover, DGAT2 was identified to associate with LDs, where it prefers ATGL-derived *sn*-1,3 DAGs for

re-esterification into TAGs. It is proposed that, at least in adipocytes, ATGL-derived *sn*-1,3 and *sn*-2,3 DAGs are either substrates for HSL-mediated catabolism or for DGAT2-mediated TAG synthesis, but do not serve directly as a substrate for PL biosynthesis or PKC (protein kinase C) activation [85]. To investigate whether ATGL is also involved in LD lipolysis in other human cell types, Smirnova et al. [18] modulated the level of the enzyme in HeLa cells by RNA interference or by overexpression of wild-type and a mutated form of GFP (green fluorescent protein)-labelled ATGL respectively. LD size was inversely correlated with ATGL activity present in the cells, indicating that the enzyme probably is, in addition to adipocytes, also a key enzyme for LD catabolism in other cell types. Interestingly, ATGL is a member of a family of lipases with high homology to serine esterases including the PLA<sub>2</sub>s (Figure 4 in [18]). In particular, an invariant serine residue in the core of the catalytic domain is found in ATGL and human cPLA<sub>2</sub>.

A recent report [86] implies that LD content in murine MCs (the cell line RBL-2H3 and murine BMMCs) is regulated differently from that in adipocytes (3T3-L1). Although the authors [86] suggested that lipogenic stimuli, such as insulin, initiate the formation of LDs in both adipocytes and MCs, the TAG content of MCs, as measured with a TAG quantification kit, did not increase as much as that in adipocytes. This finding is interpreted to indicate that LDs of lipogenesis-induced MCs do accumulate lipids that are different from those in adipocytes. However, lipid staining of insulin-treated cells with Oil Red O revealed massive accumulation of neutral lipids in LDs of MCs. Furthermore, the authors interpreted their findings to support the claims that eicosanoid synthesis is localized to LDs, but such an implication was not supported by direct analysis of the protein content of these organelles [86]. Thus the experiments described above do not exclude the possibility that LDs contribute to eicosanoid production from TAG-derived AA. In fact, studies from our laboratory have shown that mature human MCs obtained from peripheral-blood-derived CD34<sup>+</sup> progenitors form LDs enriched in AA-containing TAG species following incubation with the precursor fatty acid [55]. Significantly, the secretion of PGD<sub>2</sub> from these cells within 5 min after IgE/anti-IgE stimulation was attenuated by knocking-down HSL or ATGL alone and most extensively when both enzymes were knocked down (A. Dichlberger, S. Schlager, W. J. Schneider and P. T. Kovanen, unpublished work).

Although the preliminary data described above are compatible, although unlikely, with a direct contribution of TAG-AA for eicosanoid synthesis, the transfer of AA from the LD TAG pool to the LD PL monolayer and subsequent release from the monolayer by PLA<sub>2</sub> within a few minutes must be studied experimentally. This requires manipulation of the PLA<sub>2</sub>(s) involved, which, unfortunately, have not been unambiguously identified (see above). However, the release of AA from TAG molecules requires the reacylation of the DAG produced, a reaction involving the ATP-consuming activation of the fatty acid to acyl-CoA by long-chain ACSLs (acyl-CoA synthetases) [87]. Interestingly, even though reacylation may not occur in the same time frame as hydrolysis, siRNA (small interfering RNA)-mediated gene silencing of ACSL3 and ACSL4 in MCs also reduces the release of PGD<sub>2</sub> (A. Dichlberger, S. Schlager, W. J. Schneider and P. T. Kovanen,

unpublished work), which again supports the notion of a direct contribution of the TAG pool of MC LDs to PGD<sub>2</sub> secretion. These experiments provide the basis for future studies on the enzymology and regulation of PGD<sub>2</sub> synthesis, and on the identification of the sources of AA used for conversion into eicosanoids by activated MCs.

## HUMAN MCs IN THE PATHOGENESIS OF EICOSANOID-RELATED INFLAMMATORY DISEASES

Regarding the potential clinical significance of the studies discussed in the present review, we wish to emphasize that MCs are among the major producers of eicosanoids, thus contributing to the development of several inflammatory conditions, including asthma, rheumatoid arthritis and atherosclerosis [88]. In particular, MC-derived PGD<sub>2</sub> has been recognized as an important mediator in asthma by causing bronchoconstriction, vasodilation and alteration of capillary permeability [89]. Recent observations have demonstrated that PGD<sub>2</sub> regulates T<sub>H</sub>2 (T-helper type 2) inflammation in bronchial asthma via the specific interaction with its two major receptors D prostanoid receptor (DP) and chemoattractant receptor homologous molecule expressed on T<sub>H</sub>2 cells (CRTH2) [89].

Activated MCs are also present in atherosclerotic segments of human coronary arteries [90], and a role for MC-derived eicosanoids has been suggested to contribute to the pathogenesis of human cardiovascular diseases. Both, prostanoids (e.g. PGD<sub>2</sub> and its metabolites) and LTs (e.g. LTB<sub>4</sub> and cysLTs) have been reported to promote atherosclerosis [91] and abdominal aortic aneurysm [92]. An aspect of clinical importance is the emerging concept that resolution of inflammation requires a biosynthetically active process utilizing polyunsaturated fatty acids [i.e. AA, EPA (eicosapentaenoic acid) and DHA (docosahexaenoic acid)] to produce specialized pro-resolving mediators [93]. Although these components have not been studied, nor any relevant process investigated in MCs, it appears plausible that such pathways may operate in these cells, providing them with the capacity to contribute to the reinstatement of homeostasis, as well.

Thus a detailed molecular understanding of the generation of MC-derived eicosanoids may help us to design drugs that block pathophysiologically critical components of the AA pathway in MCs, which may emerge as novel targets in the treatment of chronic inflammatory diseases, such as asthma and atherosclerosis.

### ACKNOWLEDGEMENTS

W.J.S. is a Senior Visiting Researcher of the Sigrid Juselius Foundation, Helsinki, Finland. The Wihuri Research Institute is maintained by the Jenny and Antti Wihuri Foundation.

### FUNDING

Our own work was supported by the Sigrid Juselius Foundation. A.D. was supported by the Austrian Science Fund via an Erwin Schrödinger Fellowship [grant number J2994-B20].

## REFERENCES

- Beller, M., Thiel, K., Thul, P. J. and Jackle, H. (2010) Lipid droplets: a dynamic organelle moves into focus. *FEBS Lett.* **584**, 2176–2182
- Brasaemle, D. L. (2007) The perilipin family of structural lipid droplet proteins: stabilization of lipid droplets and control of lipolysis. *J. Lipid Res.* **48**, 2547–2559
- Goodman, J. M. (2008) The gregarious lipid droplet. *J. Biol. Chem.* **283**, 28005–28009
- Goodman, J. M. (2009) Demonstrated and inferred metabolism associated with cytosolic lipid droplets. *J. Lipid Res.* **50**, 2148–2156
- Olofsson, S. O., Bostrom, P., Andersson, L., Rutberg, M., Perman, J. and Boren, J. (2009) Lipid droplets as dynamic organelles connecting storage and efflux of lipids. *Biochim. Biophys. Acta* **1791**, 448–458
- Walther, T. C. and Farese, Jr, R. V. (2009) The life of lipid droplets. *Biochim. Biophys. Acta* **1791**, 459–466
- Walther, T. C. and Farese, Jr, R. V. (2012) Lipid droplets and cellular lipid metabolism. *Annu. Rev. Biochem.* **81**, 687–714
- Blaner, W. S., O'Byrne, S. M., Wongsiriroj, N., Kluwe, J., D'Ambrosio, D. M., Jiang, H., Schwabe, R. F., Hillman, E. M., Piantadosi, R. and Libien, J. (2009) Hepatic stellate cell lipid droplets: a specialized lipid droplet for retinoid storage. *Biochim. Biophys. Acta* **1791**, 467–473
- Testerink, N., Ajat, M., Houweling, M., Brouwers, J. F., Pully, V. V., van Manen, H. J., Otto, C., Helms, J. B. and Vaandrager, A. B. (2012) Replacement of retinyl esters by polyunsaturated triacylglycerol species in lipid droplets of hepatic stellate cells during activation. *PLoS One* **7**, e34945
- Bartz, R., Li, W. H., Venables, B., Zehmer, J. K., Roth, M. R., Welti, R., Anderson, R. G., Liu, P. and Chapman, K. D. (2007) Lipidomics reveals that adiposomes store ether lipids and mediate phospholipid traffic. *J. Lipid Res.* **48**, 837–847
- Chilton, F. H. and Connell, T. R. (1988) 1-ether-linked phosphoglycerides. Major endogenous sources of arachidonate in the human neutrophil. *J. Biol. Chem.* **263**, 5260–5265
- Kumar, V., Butcher, S. J., Oorni, K., Engelhardt, P., Heikkonen, J., Kaski, K., Ala-Korpela, M. and Kovanen, P. T. (2011) Three-dimensional cryoEM reconstruction of native LDL particles to 16A resolution at physiological body temperature. *PLoS One* **6**, e18841
- Mikl, C., Peters, J., Trapp, M., Kornmueller, K., Schneider, W. J. and Prassl, R. (2011) Softness of atherogenic lipoproteins: a comparison of very low density lipoprotein (VLDL) and low density lipoprotein (LDL) using elastic incoherent neutron scattering (EINS). *J. Am. Chem. Soc.* **133**, 13213–13215
- Czabany, T., Wagner, A., Zweytick, D., Lohner, K., Leitner, E., Ingolic, E. and Daum, G. (2008) Structural and biochemical properties of lipid particles from the yeast *Saccharomyces cerevisiae*. *J. Biol. Chem.* **283**, 17065–17074
- Robenek, H., Buers, I., Hofnagel, O., Robenek, M. J., Troyer, D. and Severs, N. J. (2009) Compartmentalization of proteins in lipid droplet biogenesis. *Biochim. Biophys. Acta* **1791**, 408–418
- Wan, H. C., Melo, R. C., Jin, Z., Dvorak, A. M. and Weller, P. F. (2007) Roles and origins of leukocyte lipid bodies: proteomic and ultrastructural studies. *FASEB J.* **21**, 167–178
- Liu, P., Ying, Y., Zhao, Y., Mundy, D. I., Zhu, M. and Anderson, R. G. (2004) Chinese hamster ovary K2 cell lipid droplets appear to be metabolic organelles involved in membrane traffic. *J. Biol. Chem.* **279**, 3787–3792
- Smirnova, E., Goldberg, E. B., Makarova, K. S., Lin, L., Brown, W. J. and Jackson, C. L. (2006) ATGL has a key role in lipid droplet/adiposome degradation in mammalian cells. *EMBO Rep.* **7**, 106–113
- Zechner, R., Kienesberger, P. C., Haemmerle, G., Zimmermann, R. and Lass, A. (2009) Adipose triglyceride lipase and the lipolytic catabolism of cellular fat stores. *J. Lipid Res.* **50**, 3–21

- 20 Aoki, N., Jin-no, S., Nakagawa, Y., Asai, N., Arakawa, E., Tamura, N., Tamura, T. and Matsuda, T. (2007) Identification and characterization of microvesicles secreted by 3T3-L1 adipocytes: redox- and hormone-dependent induction of milk fat globule-epidermal growth factor 8-associated microvesicles. *Endocrinology* **148**, 3850–3862
- 21 Muller, G., Jung, C., Straub, J., Wied, S. and Kramer, W. (2009) Induced release of membrane vesicles from rat adipocytes containing glycosylphosphatidylinositol-anchored microdomain and lipid droplet signalling proteins. *Cell. Signalling* **21**, 324–338
- 22 Kimmel, A. R., Brasaemle, D. L., McAndrews-Hill, M., Sztalryd, C. and Londos, C. (2010) Adoption of PERILIPIN as a unifying nomenclature for the mammalian PAT-family of intracellular lipid storage droplet proteins. *J. Lipid Res.* **51**, 468–471
- 23 Azouz, N. P., Matsui, T., Fukuda, M. and Sagi-Eisenberg, R. (2012) Decoding the regulation of mast cell exocytosis by networks of Rab GTPases. *J. Immunol.* **189**, 2169–2180
- 24 Murphy, S., Martin, S. and Parton, R. G. (2009) Lipid droplet-organelle interactions; sharing the fats. *Biochim. Biophys. Acta* **1791**, 441–447
- 25 Fujimoto, T., Kogo, H., Ishiguro, K., Tauchi, K. and Nomura, R. (2001) Caveolin-2 is targeted to lipid droplets, a new 'membrane domain' in the cell. *J. Cell Biol.* **152**, 1079–1085
- 26 Le Lay, S., C, M. B., Hajduch, E. and Dugail, I. (2009) Filling up adipocytes with lipids. Lessons from caveolin-1 deficiency. *Biochim. Biophys. Acta* **1791**, 514–518
- 27 Umlauf, E., Csaszar, E., Moertelmaier, M., Schuetz, G. J., Parton, R. G. and Prohaska, R. (2004) Association of stomatin with lipid bodies. *J. Biol. Chem.* **279**, 23699–23709
- 28 Brasaemle, D. L., Dolios, G., Shapiro, L. and Wang, R. (2004) Proteomic analysis of proteins associated with lipid droplets of basal and lipolytically stimulated 3T3-L1 adipocytes. *J. Biol. Chem.* **279**, 46835–46842
- 29 Zehmer, J. K., Huang, Y., Peng, G., Pu, J., Anderson, R. G. and Liu, P. (2009) A role for lipid droplets in inter-membrane lipid traffic. *Proteomics* **9**, 914–921
- 30 Ducharme, N. A. and Bickel, P. E. (2008) Lipid droplets in lipogenesis and lipolysis. *Endocrinology* **149**, 942–949
- 31 Boyce, J. A. (2007) Mast cells and eicosanoid mediators: a system of reciprocal paracrine and autocrine regulation. *Immunol. Rev.* **217**, 168–185
- 32 Ploegh, H. L. (2007) A lipid-based model for the creation of an escape hatch from the endoplasmic reticulum. *Nature* **448**, 435–438
- 33 Robenek, H., Hofnagel, O., Buers, I., Robenek, M. J., Troyer, D. and Severs, N. J. (2006) Adipophilin-enriched domains in the ER membrane are sites of lipid droplet biogenesis. *J. Cell Sci.* **119**, 4215–4224
- 34 Jacquier, N., Choudhary, V., Mari, M., Toulmay, A., Reggiori, F. and Schneider, R. (2011) Lipid droplets are functionally connected to the endoplasmic reticulum in *Saccharomyces cerevisiae*. *J. Cell Sci.* **124**, 2424–2437
- 35 Melo, R. C., D'Avila, H., Wan, H. C., Bozza, P. T., Dvorak, A. M. and Weller, P. F. (2011) Lipid bodies in inflammatory cells: structure, function, and current imaging techniques. *J. Histochem. Cytochem.* **59**, 540–556
- 36 Dvorak, A. M., Dvorak, H. F., Peters, S. P., Shulman, E. S., MacGlashan, Jr, D. W., Pyne, K., Harvey, V. S., Galli, S. J. and Lichtenstein, L. M. (1983) Lipid bodies: cytoplasmic organelles important to arachidonate metabolism in macrophages and mast cells. *J. Immunol.* **131**, 2965–2976
- 37 Dvorak, A. M., Hammel, I., Schulman, E. S., Peters, S. P., MacGlashan, Jr, D. W., Schleimer, R. P., Newball, H. H., Pyne, K., Dvorak, H. F., Lichtenstein, L. M. et al. (1984) Differences in the behavior of cytoplasmic granules and lipid bodies during human lung mast cell degranulation. *J. Cell Biol.* **99**, 1678–1687
- 38 Weller, P. F., Monahan-Earley, R. A., Dvorak, H. F. and Dvorak, A. M. (1991) Cytoplasmic lipid bodies of human eosinophils. Subcellular isolation and analysis of arachidonate incorporation. *Am. J. Pathol.* **138**, 141–148
- 39 Logan, M. R., Odemuyiwa, S. O. and Moqbel, R. (2003) Understanding exocytosis in immune and inflammatory cells: the molecular basis of mediator secretion. *J. Allergy Clin. Immunol.* **111**, 923–932
- 40 Plotkowski, M. C., Brandao, B. A., de Assis, M. C., Feliciano, L. F., Raymond, B., Freitas, C., Saliba, A. M., Zahm, J. M., Touqui, L. and Bozza, P. T. (2008) Lipid body mobilization in the ExoU-induced release of inflammatory mediators by airway epithelial cells. *Microb. Pathog.* **45**, 30–37
- 41 Triggiani, M., Oriente, A. and Marone, G. (1994) Differential roles for triglyceride and phospholipid pools of arachidonic acid in human lung macrophages. *J. Immunol.* **152**, 1394–1403
- 42 Yu, W., Bozza, P. T., Tzizik, D. M., Gray, J. P., Cassara, J., Dvorak, A. M. and Weller, P. F. (1998) Co-compartmentalization of MAP kinases and cytosolic phospholipase A2 at cytoplasmic arachidonate-rich lipid bodies. *Am. J. Pathol.* **152**, 759–769
- 43 Triggiani, M., Oriente, A., Seeds, M. C., Bass, D. A., Marone, G. and Chilton, F. H. (1995) Migration of human inflammatory cells into the lung results in the remodeling of arachidonic acid into a triglyceride pool. *J. Exp. Med.* **182**, 1181–1190
- 44 Bozza, P. T., Bakker-Abreu, I., Navarro-Xavier, R. A. and Bandeira-Melo, C. (2011) Lipid body function in eicosanoid synthesis: an update. *Prostaglandins Leukotr. Essent. Fatty Acids* **85**, 205–213
- 45 Theoharides, T. C., Kempuraj, D., Tagen, M., Conti, P. and Kalogeromitros, D. (2007) Differential release of mast cell mediators and the pathogenesis of inflammation. *Immunol. Rev.* **217**, 65–78
- 46 Galli, S. J. and Tsai, M. (2012) IgE and mast cells in allergic disease. *Nat. Med.* **18**, 693–704
- 47 Kovanen, P. T. (2007) Mast cells: multipotent local effector cells in atherothrombosis. *Immunol. Rev.* **217**, 105–122
- 48 Funk, C. D. (2001) Prostaglandins and leukotrienes: advances in eicosanoid biology. *Science* **294**, 1871–1875
- 49 Lundstrom, S. L., Saluja, R., Adner, M., Haeggstrom, J. Z., Nilsson, G. P. and Wheelock, C. E. (2013) Lipid mediator metabolic profiling demonstrates differences in eicosanoid patterns in two phenotypically distinct mast cell populations. *J. Lipid Res.* **54**, 116–126
- 50 Gheorghe, K. R., Korotkova, M., Catrina, A. I., Backman, L., af Klint, E., Claesson, H. E., Radmark, O. and Jakobsson, P. J. (2009) Expression of 5-lipoxygenase and 15-lipoxygenase in rheumatoid arthritis synovium and effects of intraarticular glucocorticoids. *Arthritis Res. Ther.* **11**, R83
- 51 Gulliksson, M., Brunnstrom, A., Johannesson, M., Backman, L., Nilsson, G., Harvima, I., Dahlen, B., Kumlin, M. and Claesson, H. E. (2007) Expression of 15-lipoxygenase type-1 in human mast cells. *Biochim. Biophys. Acta* **1771**, 1156–1165
- 52 Back, M. and Hansson, G. K. (2006) Leukotriene receptors in atherosclerosis. *Ann. Med.* **38**, 493–502
- 53 Enoksson, M., Lyberg, K., Moller-Westerberg, C., Fallon, P. G., Nilsson, G. and Lunderius-Andersson, C. (2011) Mast cells as sensors of cell injury through IL-33 recognition. *J. Immunol.* **186**, 2523–2528
- 54 Bozza, P. T., Magalhaes, K. G. and Weller, P. F. (2009) Leukocyte lipid bodies – Biogenesis and functions in inflammation. *Biochim. Biophys. Acta* **1791**, 540–551
- 55 Dichlberger, A., Schlager, S., Lappalainen, J., Kakela, R., Hattula, K., Butcher, S. J., Schneider, W. J. and Kovanen, P. T. (2011) Lipid body formation during maturation of human mast cells. *J. Lipid Res.* **52**, 2198–2208
- 56 Lappalainen, J., Lindstedt, K. A. and Kovanen, P. T. (2007) A protocol for generating high numbers of mature and functional human mast cells from peripheral blood. *Clin. Exp. Allergy* **37**, 1404–1414



- 57 Andersen, H. B., Holm, M., Hetland, T. E., Dahl, C., Junker, S., Schiøtz, P. O. and Hoffmann, H. J. (2008) Comparison of short term *in vitro* cultured human mast cells from different progenitors: peripheral blood-derived progenitors generate highly mature and functional mast cells. *J. Immunol. Methods*. **336**, 166–174
- 58 Minai-Fleminger, Y., Elishmereni, M., Vita, F., Soranzo, M. R., Mankuta, D., Zabucchi, G. and Levi-Schaffer, F. (2010) Ultrastructural evidence for human mast cell-eosinophil interactions *in vitro*. *Cell Tissue Res*. **341**, 405–415
- 59 Weller, P. F., Bozza, P. T., Yu, W. and Dvorak, A. M. (1999) Cytoplasmic lipid bodies in eosinophils: central roles in eicosanoid generation. *Int. Arch. Allergy Immunol.* **118**, 450–452
- 60 Granata, F., Nardicchi, V., Loffredo, S., Frattini, A., Ilaria Staiano, R., Agostini, C. and Triggiani, M. (2009) Secreted phospholipases A<sub>2</sub>: a proinflammatory connection between macrophages and mast cells in the human lung. *Immunobiology* **214**, 811–821
- 61 Peters, S. P., MacGlashan, Jr, D. W., Schleimer, R. P., Hayes, E. C., Adkinson, Jr, N. F. and Lichtenstein, L. M. (1985) The pharmacologic modulation of the release of arachidonic acid metabolites from purified human lung mast cells. *Am. Rev. Respir. Dis.* **132**, 367–373
- 62 Schleimer, R. P., MacGlashan, Jr, D. W., Peters, S. P., Pinckard, R. N., Adkinson, Jr, N. F. and Lichtenstein, L. M. (1986) Characterization of inflammatory mediator release from purified human lung mast cells. *Am. Rev. Respir. Dis.* **133**, 614–617
- 63 Sztalryd, C., Xu, G., Dorward, H., Tansey, J. T., Contreras, J. A., Kimmel, A. R. and Londres, C. (2003) Perilipin A is essential for the translocation of hormone-sensitive lipase during lipolytic activation. *J. Cell Biol.* **161**, 1093–1103
- 64 Schaloske, R. H. and Dennis, E. A. (2006) The phospholipase A<sub>2</sub> superfamily and its group numbering system. *Biochim. Biophys. Acta* **1761**, 1246–1259
- 65 Garcia-Gil, M. and Siraganian, R. P. (1986) Source of the arachidonic acid released on stimulation of rat basophilic leukemia cells. *J. Immunol.* **136**, 3825–3828
- 66 Kennerly, D. A. (1990) Phosphatidylcholine is a quantitatively more important source of increased 1,2-diacylglycerol than is phosphatidylinositol in mast cells. *J. Immunol.* **144**, 3912–3919
- 67 Yamada, K., Okano, Y., Miura, K. and Nozawa, Y. (1987) A major role for phospholipase A<sub>2</sub> in antigen-induced arachidonic acid release in rat mast cells. *Biochem. J.* **247**, 95–99
- 68 Chock, S. P., Rhee, S. G., Tang, L. C. and Schmauder-Chock, E. A. (1991) Linking phospholipase A<sub>2</sub> to phospholipid turnover and prostaglandin synthesis in mast cell granules. *Eur. J. Biochem.* **195**, 707–713
- 69 Kitatani, K., Akiba, S. and Sato, T. (2000) Role of phospholipase D-derived phosphatidic acid as a substrate for phospholipase A<sub>2</sub> in RBL-2H3 cells. *Biol. Pharm. Bull.* **23**, 1430–1433
- 70 Goetzl, E. J. and An, S. (1998) Diversity of cellular receptors and functions for the lysophospholipid growth factors lysophosphatidic acid and sphingosine 1-phosphate. *FASEB J.* **12**, 1589–1598
- 71 Kennerly, D. A. (1987) Diacylglycerol metabolism in mast cells. Analysis of lipid metabolic pathways using molecular species analysis of intermediates. *J. Biol. Chem.* **262**, 16305–16313
- 72 Mounier, C. M., Ghomashchi, F., Lindsay, M. R., James, S., Singer, A. G., Parton, R. G. and Gelb, M. H. (2004) Arachidonic acid release from mammalian cells transfected with human groups IIA and X secreted phospholipase A<sub>2</sub> occurs predominantly during the secretory process and with the involvement of cytosolic phospholipase A<sub>2</sub>- $\alpha$ . *J. Biol. Chem.* **279**, 25024–25038
- 73 Oorni, K. and Kovanen, P. T. (2009) Lipoprotein modification by secretory phospholipase A(2) enzymes contributes to the initiation and progression of atherosclerosis. *Curr. Opin. Lipidol.* **20**, 421–427
- 74 Nakatani, Y., Hara, S., Murakami, M., Kudo, I. and Inoue, K. (1994) Characterization of cytosolic phospholipase A<sub>2</sub> in rat mastocytoma RBL-2H3. *Biol. Pharm. Bull.* **17**, 47–50
- 75 Sapirstein, A. and Bonventre, J. V. (2000) Specific physiological roles of cytosolic phospholipase A<sub>2</sub> as defined by gene knockouts. *Biochim. Biophys. Acta* **1488**, 139–148
- 76 Murakami, M., Taketomi, Y., Miki, Y., Sato, H., Hirabayashi, T. and Yamamoto, K. (2011) Recent progress in phospholipase A<sub>2</sub> research: from cells to animals to humans. *Prog. Lipid Res.* **50**, 152–192
- 77 Murakami, M., Kudo, I., Umeda, M., Matsuzawa, A., Takeda, M., Komada, M., Fujimori, Y., Takahashi, K. and Inoue, K. (1992) Detection of three distinct phospholipases A<sub>2</sub> in cultured mast cells. *J. Biochem.* **111**, 175–181
- 78 Fonteh, A. N., Bass, D. A., Marshall, L. A., Seeds, M., Samet, J. M. and Chilton, F. H. (1994) Evidence that secretory phospholipase A<sub>2</sub> plays a role in arachidonic acid release and eicosanoid biosynthesis by mast cells. *J. Immunol.* **152**, 5438–5446
- 79 Enomoto, A., Murakami, M., Valentin, E., Lambeau, G., Gelb, M. H. and Kudo, I. (2000) Redundant and segregated functions of granule-associated heparin-binding group II subfamily of secretory phospholipases A<sub>2</sub> in the regulation of degranulation and prostaglandin D<sub>2</sub> synthesis in mast cells. *J. Immunol.* **165**, 4007–4014
- 80 Kikawada, E., Bonventre, J. V. and Arm, J. P. (2007) Group V secretory PLA<sub>2</sub> regulates TLR2-dependent eicosanoid generation in mouse mast cells through amplification of ERK and cPLA<sub>2</sub> $\alpha$  activation. *Blood* **110**, 561–567
- 81 Kim, K. P., Rafter, J. D., Bittova, L., Han, S. K., Snitko, Y., Munoz, N. M., Leff, A. R. and Cho, W. (2001) Mechanism of human group V phospholipase A<sub>2</sub> (PLA<sub>2</sub>)-induced leukotriene biosynthesis in human neutrophils. A potential role of heparan sulfate binding in PLA<sub>2</sub> internalization and degradation. *J. Biol. Chem.* **276**, 11126–11134
- 82 Munoz, N. M., Kim, Y. J., Meliton, A. Y., Kim, K. P., Han, S. K., Boetticher, E., O'Leary, E., Myou, S., Zhu, X., Bonventre, J. V. et al. (2003) Human group V phospholipase A<sub>2</sub> induces group IVA phospholipase A<sub>2</sub>-independent cysteinyl leukotriene synthesis in human eosinophils. *J. Biol. Chem.* **278**, 38813–38820
- 83 Dvorak, A. M., Morgan, E., Schleimer, R. P., Ryeom, S. W., Lichtenstein, L. M. and Weller, P. F. (1992) Ultrastructural immunogold localization of prostaglandin endoperoxide synthase (cyclooxygenase) to non-membrane-bound cytoplasmic lipid bodies in human lung mast cells, alveolar macrophages, type II pneumocytes, and neutrophils. *J. Histochem. Cytochem.* **40**, 759–769
- 84 Zechner, R., Zimmermann, R., Eichmann, T. O., Kohlwein, S. D., Haemmerle, G., Lass, A. and Madeo, F. (2012) FAT SIGNALS: lipases and lipolysis in lipid metabolism and signaling. *Cell Metab.* **15**, 279–291
- 85 Eichmann, T. O., Kumari, M., Haas, J. T., Farese, Jr, R. V., Zimmermann, R., Lass, A. and Zechner, R. (2012) Studies on the substrate and stereo/regioselectivity of adipose triglyceride lipase, hormone-sensitive lipase, and diacylglycerol-O-acyltransferases. *J. Biol. Chem.* **287**, 41446–41457
- 86 Greineisen, W. E., Shimoda, L. M., Maaetoft-Udsen, K. and Turner, H. (2012) Insulin-containing lipogenic stimuli suppress mast cell degranulation potential and up-regulate lipid body biogenesis and eicosanoid secretion in a PPAR $\gamma$ -independent manner. *J. Leukocyte Biol.* **92**, 653–665
- 87 Soupene, E. and Kuypers, F. A. (2008) Mammalian long-chain acyl-CoA synthetases. *Exp. Biol. Med.* **233**, 507–521
- 88 Ferrante, A. and Hii, C. (2011) Polyunsaturated fatty acids and inflammatory diseases. *Inflammatory Diseases: A Modern Perspective* (Nagal, A., ed.), pp. 157–178, InTech, New York
- 89 Arima, M. and Fukuda, T. (2011) Prostaglandin D<sub>2</sub> and T<sub>H</sub>2 inflammation in the pathogenesis of bronchial asthma. *Korean J. Intern. Med.* **26**, 8–18

- 90 Laine, P., Kaartinen, M., Penttila, A., Panula, P., Paavonen, T. and Kovanen, P. T. (1999) Association between myocardial infarction and the mast cells in the adventitia of the infarct-related coronary artery. *Circulation* **99**, 361–369
- 91 Roberts, II, L. J., Seibert, K., Liston, T. E., Tantengco, M. V. and Robertson, R. M. (1987) PGD<sub>2</sub> is transformed by human coronary arteries to 9 $\alpha$ , 11 $\beta$ -PGF<sub>2</sub>, which contracts human coronary artery rings. *Adv. Prostaglandin Thromboxane Leukot. Res.* **17A**, 427–429
- 92 Di Gennaro, A., Wagsater, D., Mayranpaa, M. I., Gabrielsen, A., Swedenborg, J., Hamsten, A., Samuelsson, B., Eriksson, P and Haeggstrom, J. Z. (2010) Increased expression of leukotriene C<sub>4</sub> synthase and predominant formation of cysteinyl-leukotrienes in human abdominal aortic aneurysm. *Proc. Natl. Acad. Sci. U.S.A.* **107**, 21093–21097
- 93 Serhan, C. N. and Petasis, N. A. (2011) Resolvins and protectins in inflammation resolution. *Chem. Rev.* **111**, 5922–5943

Received 9 November 2012/7 February 2013; accepted 15 February 2013

Published on the Internet 12 April 2013, doi: 10.1042/CS20120602
